# Supplementary material
Source: PubMed Central journal article supplement (PMC7444774)
Supplement: LIO2-5-649-s001.pdf [file LIO2-5-649-s001.pdf]

## Supplementary Appendix A: Search strings

- **Pubmed:** ("telemedicine" OR "telehealth" OR "remote monitoring" OR "virtual visit" OR "virtual consultation") AND ("facial trauma" OR "facial injury" OR "facial" OR "face trauma" OR "face injury") AND (("1997/06/01"[PDAT] : "2020/04/30"[PDAT]) AND English[lang])
- **Embase:** ('telemedicine' OR 'telehealth' OR 'remote monitoring' OR 'virtual visit' OR 'virtual consultation') AND ('facial trauma' OR 'facial injury' OR 'facial' OR 'face trauma' OR 'face injury') AND [english]/lim AND ([1-6-1997]/sd NOT [30-4-2020]/sd) AND [embase]/lim NOT ([embase]/lim AND [medline]/lim)
- **Web of Science:** (ALL=("telemedicine" OR "telehealth" OR "remote monitoring" OR "virtual visit" OR "virtual consultation") AND ALL=("facial trauma" OR "facial injury" OR "facial" OR "face trauma" OR "face injury")) AND LANGUAGE: (English) AND Timespan: 1997-2020  
Indexes: SCI-EXPANDED, SSCI, A&HCI, CPCI-S, CPCI-SSH, BKCI-S, BKCI-SSH, ESCI, CCR-EXPANDED, IC.
